# Supplementary material for: Amine-functionalized holey graphene as a highly active metal-free catalyst for the oxygen reduction reaction
Source: Royal Society of Chemistry journal article supplement (doi:10.1039/c3ta13832a), 2013-10-31
Supplement: c3ta13832a.pdf [file c3ta13832a.pdf]

## Supporting Information

### Amine-Functionalized Holey Graphene as a Highly Active Metal-Free Catalyst for Oxygen Reduction Reaction

Zhongqing Jiang<sup>a</sup>, Zhong-jie Jiang<sup>b,\*</sup>, Xiaoning Tian<sup>a</sup>, Weiheng Chen<sup>a</sup>

<sup>a</sup> *Department of Chemical Engineering, Ningbo University of Technology, Ningbo 315016,  
Zhejiang, China.*

<sup>b</sup> *College of Environment and Energy, South China University of Technology,  
Guangzhou 510006, Guangdong, China.*

### Content:

Preparation of thermally reduced GO (graphene)

Preparation of nitrogen-doped graphene (NG)

**Figure S1.** SEM (a) and TEM (b) images of graphene.

**Figure S2.** Nitrogen adsorption–desorption isotherms of the AFHG, with the inset showing the pore-size distribution. The specific surface areas of the samples were calculated using the Brunauer–Emmett–Teller (BET) method with the adsorption data at the relative pressure (P/P<sub>0</sub>) range of 0.05–0.2. The pore size distribution plot calculated by BJH method using desorption branch of the isotherms.

**Figure S3.** Raman spectra of GO, AFG, and AFHG.

**Figure S4.** CVs of electrodes in the N<sub>2</sub> and O<sub>2</sub>-saturated 0.1 M KOH solutions at a scan rate of 10 mV s<sup>-1</sup>: (a) Graphene, (b) NG, and (c) AFG.

---

\* Corresponding Author. Tel.: +86 020-39381202. E-mail address:

[Zhongjiejiang1978@hotmail.com](mailto:Zhongjiejiang1978@hotmail.com), or [eszjiang@scut.edu.cn](mailto:eszjiang@scut.edu.cn)

**Figure S5.** LSV curves at different potentials and K-L plots of (a,b) Graphene, (c,d) NG, and (e,f) JM-Pt/C-40 wt.%.

**Preparation of thermally reduced GO (graphene).** The thermal reduction of GO has been done using a procedure reported previously.<sup>1, 2</sup> Briefly, the dry GO is loaded in an alumina crucible and is then placed in a simple horizontal tube furnace, which is then heated to 800 °C in a nitrogen atmosphere with heating rate of 5 °C min<sup>-1</sup>. After 1 h, it is cooled to room temperature, and the obtained product is graphene.

**Preparation of nitrogen-doped graphene (NG).** NG is obtained using a procedure similar to that reported with a slight modification:<sup>3</sup> Typically, 40 mg of GO is first dispersed in 40 mL of H<sub>2</sub>O by sonication, and 0.2 g of melamine is then mixed. The obtained mixture is stirred until significant agglomeration is observed. The agglomeration is then transferred to a Teflon lined autoclave for the hydrothermal reaction at 180 °C. After 12 h, it is cooled to room temperature. The obtained solution is filtrated and dried at 80 °C in an oven. The solid material is collected and homogenized into fine powders using a mortar and pestle. The obtained powders are then pyrolyzed at 800 °C for 1 h in a nitrogen atmosphere to fabricate NG.

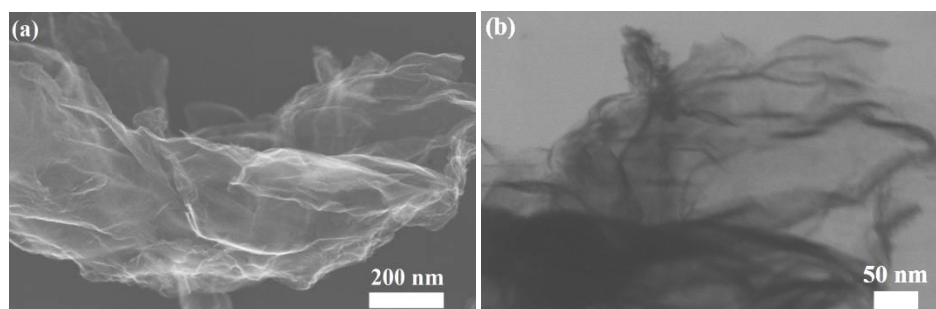

**Figure S1.** SEM (a) and TEM (b) images of graphene.

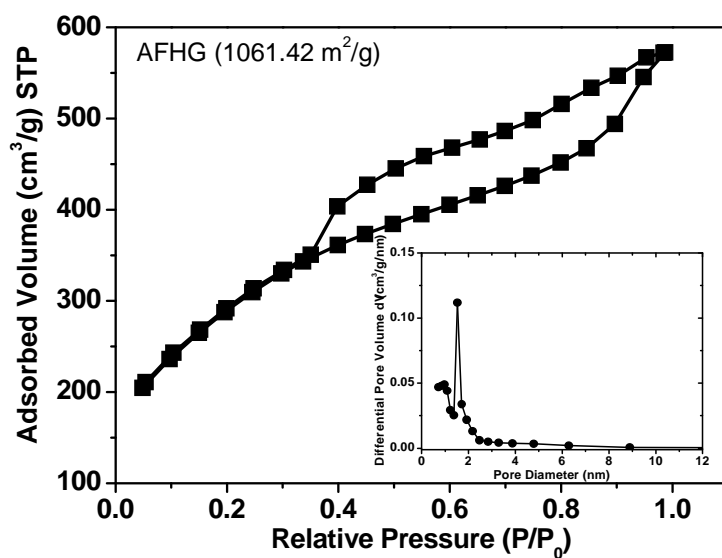

**Figure S2.** Nitrogen adsorption–desorption isotherms of the AFHG, with the inset showing the pore-size distribution. The specific surface areas of the samples were calculated using the Brunauer–Emmett–Teller (BET) method with the adsorption data at the relative pressure (P/P<sub>0</sub>) range of 0.05–0.2. The pore size distribution plot calculated by BJH method using desorption branch of the isotherms.

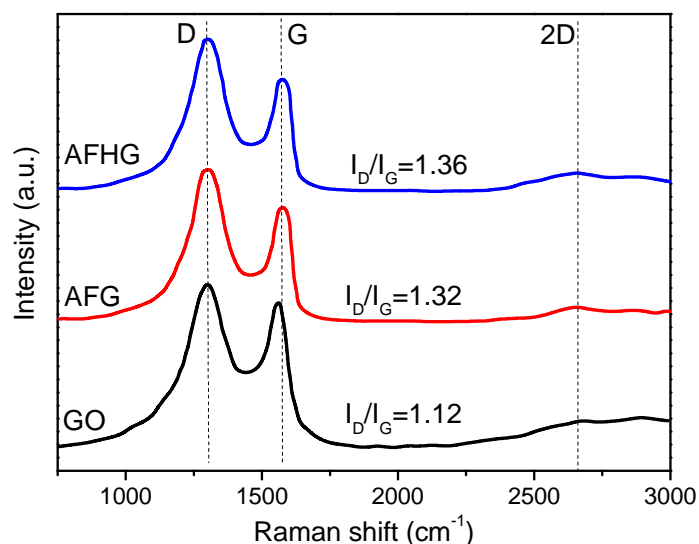

**Figure S3.** Raman spectra of GO, AFG, and AFHG.

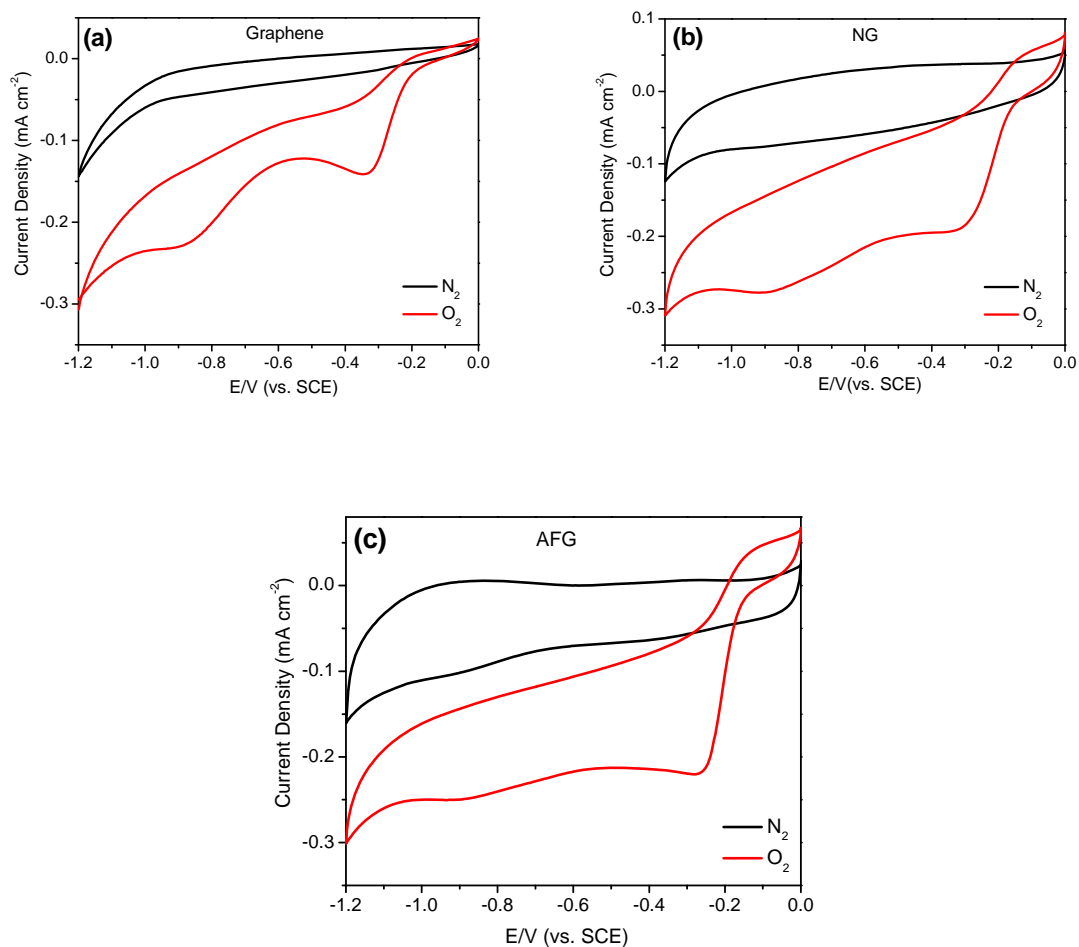

**Figure S4.** CVs of electrodes in the  $\text{N}_2$  and  $\text{O}_2$ -saturated 0.1 M KOH solutions at a scan rate of  $10 \text{ mV s}^{-1}$ : (a) Graphene (b) NG, and (c) AFG.

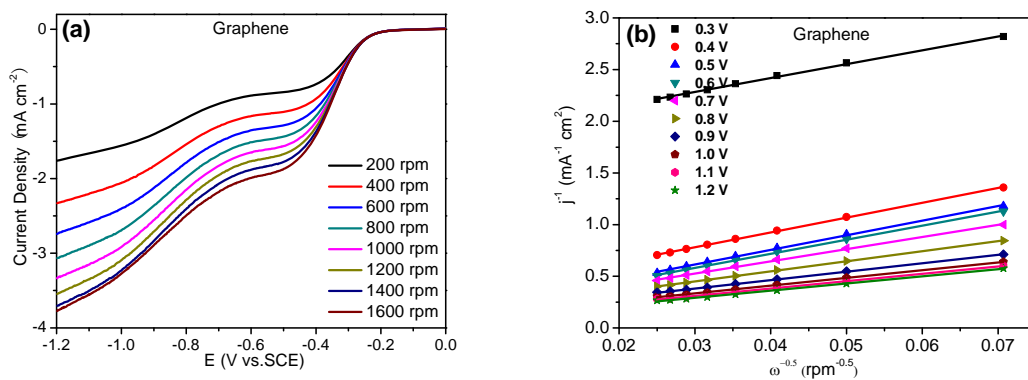

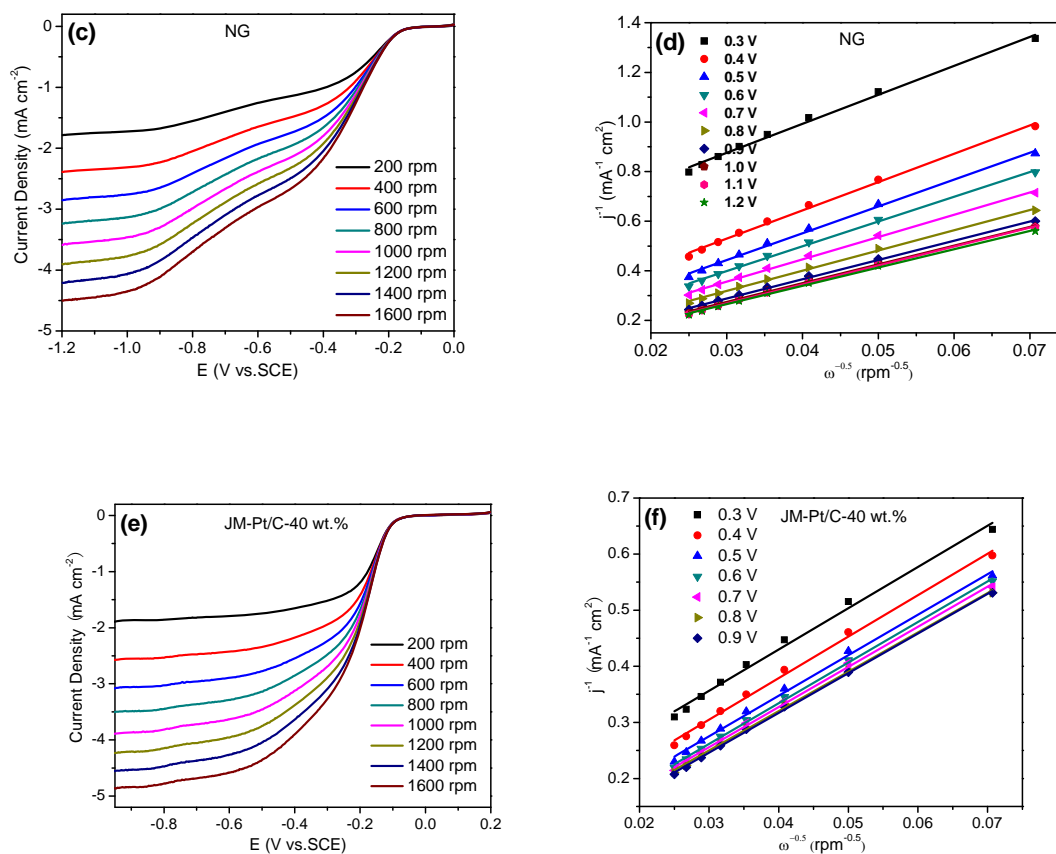

**Figure S5.** LSV curves at different potentials and K-L plots of (a,b) Graphene, (c,d) NG, and (e,f) JM-Pt/C-40 wt.%.

## REFERENCES

1. Q. Du, M. Zheng, L. Zhang, Y. Wang, J. Chen, L. Xue, W. Dai, G. Ji and J. Cao, *Electrochim. Acta*, 2010, **55**, 3897-3903.
2. B. Zhao, P. Liu, Y. Jiang, D. Pan, H. Tao, J. Song, T. Fang and W. Xu, *J. Power Sources*, 2012, **198**, 423-427.
3. Y. Sun, C. Li and G. Shi, *J. Mater. Chem.*, 2012, **22**, 12810.
